# Supplementary material for: Improving scheduling performance in congested networks
Source: PeerJ journal article supplement (doi:10.7717/peerj-cs.754), 2021-11-01
Supplement: Fig_S1.pdf [file Fig_S1.pdf]

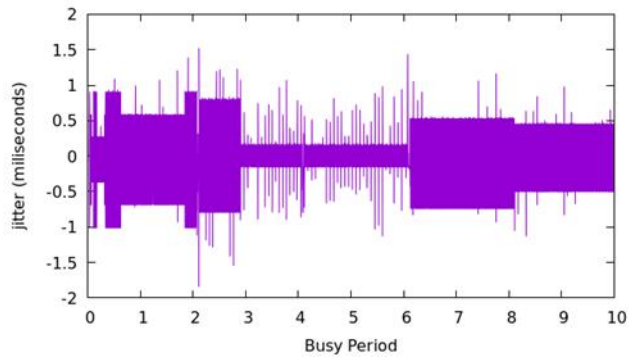

(a) - Node-1

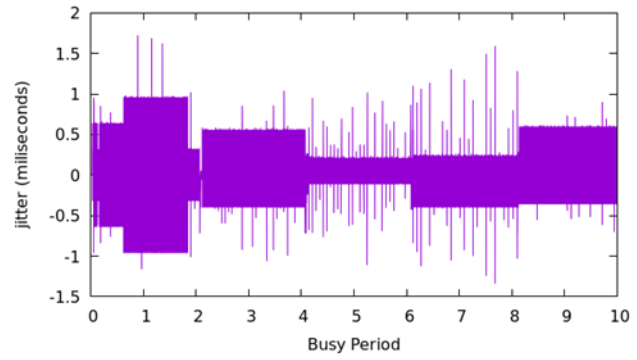

(b) - Node-2

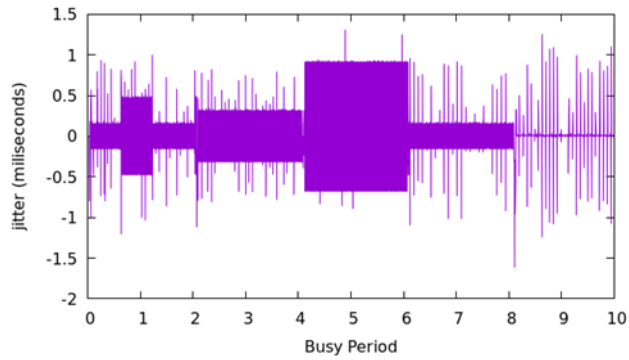

(c) - Node-3

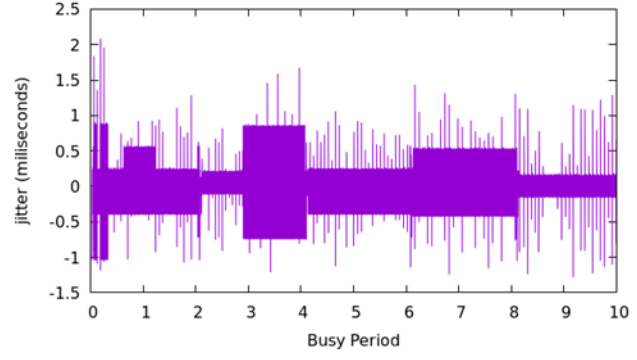

(d) - Node-4

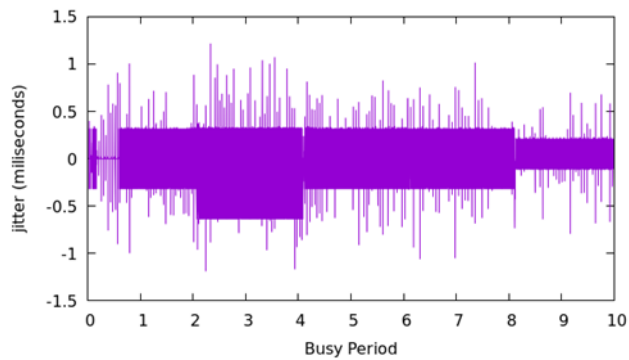

(e) - Node-5

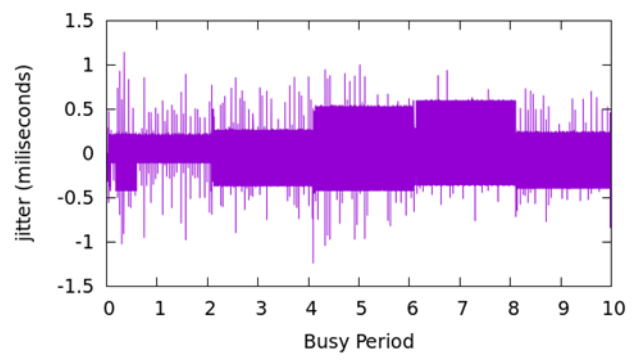

(f) - Node-6
