# Supplementary material for: Improving scheduling performance in congested networks
Source: PeerJ journal article supplement (doi:10.7717/peerj-cs.754), 2021-11-01
Supplement: Fig_S2.pdf [file Fig_S2.pdf]

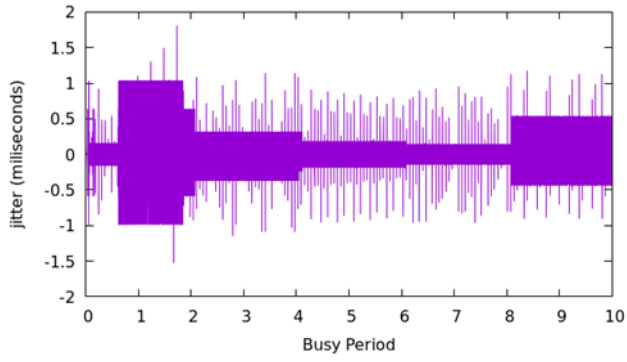

(a) : Node-1

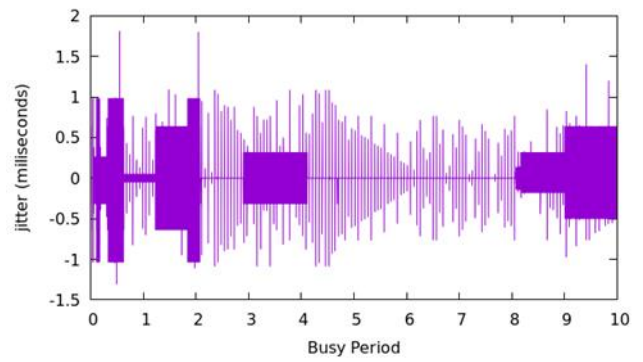

(b) : Node-2

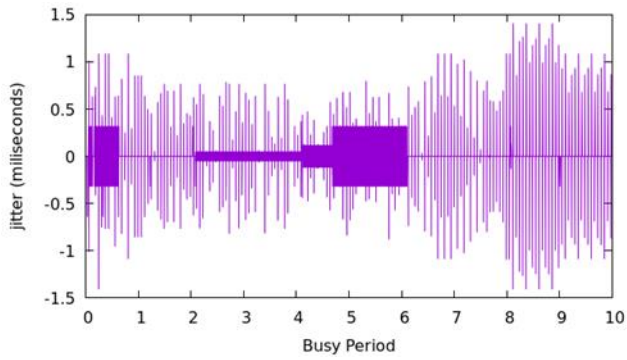

(c) : Node-2

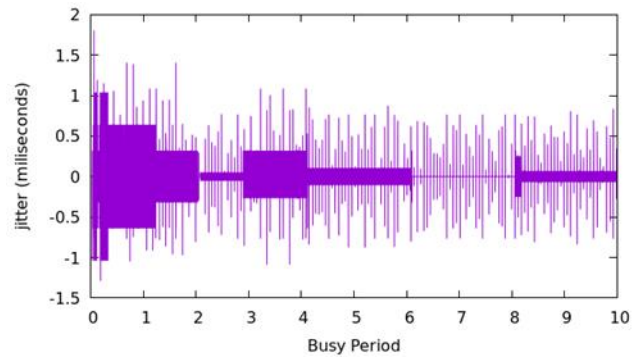

(d) : Node-2

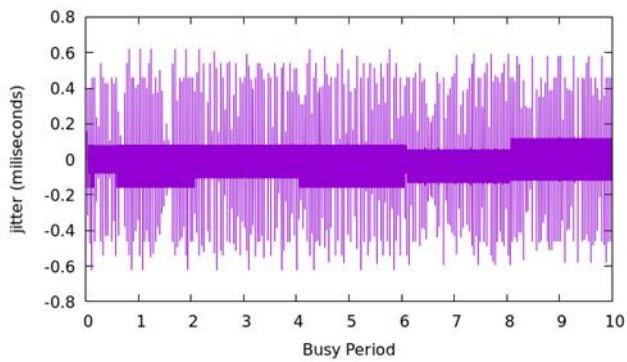

(e) : Node-2

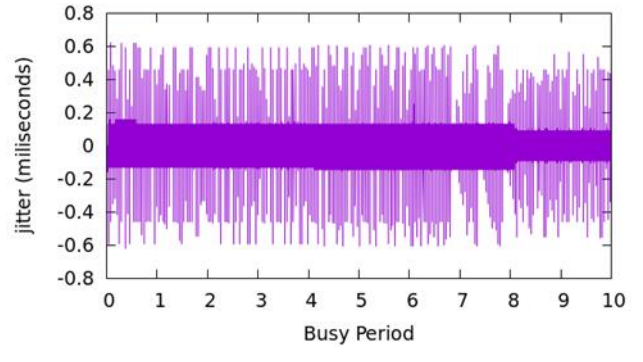

(f) : Node-2
